# Supplementary material for: Detection and Characterization of Small-Sized Microplastics (≥ 4 µm) in Milk Products
Source: Research Square preprint supplement (doi:10.21203/rs.3.rs-257514/v1), 2021-03-03
Supplement: Supplementary file 1 [file 27c01622b37cf19911062fd9.docx]

**Supplementary Information**

**Detection and characterization of small-sized microplastics (≥ 4 µm) in milk products**

**Paulo A. Da Costa Filho, Daniel Andrey, Bjorn Ericksen, Rafael Peixoto, Benoit M. Carreres, Mark Ambühl, Josep Busom Descarrega, Stephane Dubascoux, Pascal Zbinden, Alexandre Panchaud& Eric Poitevin**

Société des Produits Nestlé S.A. Nestlé Research, Route du Jorat 57, Lausanne, Switzerland.

Correspondence and requests for materials should be addressed to P.A.D.C.F (PauloAugusto.DaCostaFilho@rdls.nestle.com).

**Table S1. Raman band assignment of PMMA, PS, PP, PE and PA. (1-4)**

| PMMA | | PS | | PP | | PE | | PA | | |
| --- | --- | --- | --- | --- | --- | --- | --- | --- | --- | --- |
| Raman shift/cm-1 | Mode | Raman shift/cm-1 | Mode | Raman shift/cm-1 | Mode | Raman shift/cm-1 | Mode | Raman shift/cm-1 | Mode |
| 814 | ν (C=O) | 621 | Φd | 808 | r (CH2)  ν (C-C) | 1063 | νas (C-C) | 1636 | νs (C=O) |
| 1730 | νas (C-O-C) | 1001 | Φb | 841 | r (CH2) | 1080 | ν (C-C) | 1466 | ν (C-N) & δ (NH) |
|  |  | 1031 |  | 972 | r (CH3)  ν (C-C) | 1130 | νs (C-C) | 1442 | δ (CH2) |
|  |  | 1155 | ν (C-C) | 998 | r (CH3) | 1298 | νt (C-C) | 1307 | νt (CH2) |
|  |  | 1450 | δ (CH2) | 1151 | ν (C-C)  δ (CH) | 1418 | δ (CH2)  ω (CH2) | 1280 | ν (C-N) & δ (NH) |
|  |  | 1583 | ν (C=C) | 1168 | ν (C-C)  r (CH3)  ω (C-C) | 1440 | δ (CH2) | 1126 | ν (C-C) |
|  |  | 1602 | Φs | 1220 | νt (C-C)  ω (C-H)  ν (C-C) | 1460 | δ (CH2) | 1078 | ν (C-C) |
|  |  |  |  | 1435 | δ (CH2) |  |  | 1062 | ν (C-C) |
|  |  |  |  | 1458 | δ (CH2) |  |  | 931 | ν (C-CO) |

r rocking; Φd ring deformation, Φb ring breath; ν stretching; Φs ring stretching, νas anti-symmetric stretching; νs symmetric stretching; νt twisting; δ bending, ω wagging.

**Table S2. List of milk samples used for this study**

| **Sample Description** | **Type** | **Amount** | **Packaging** | **Collection Date** |
| --- | --- | --- | --- | --- |
| Raw Milk (Milking machine) - 1st collection | Liquid | 200 mL | PF Glass bottle | 13.03.2019 |
| Raw Milk (Milking machine) - 2nd collection | Liquid | 200 mL | PF Glass bottle | 25.04.2019 |
| Brand A Milk (3.5% Fat) | Liquid | 250 mL | Brick | 25.02.2019 |
| Brand B Milk 1 (3.9% Fat) | Liquid | 250 mL | Brick | 25.02.2019 |
| Brand C Milk (3.5% Fat) | Liquid | 500 mL | PP Bottle | 25.02.2019 |
| Brand A Milk | Powder | 350 g | PE Bag | 04.05.2020 |
| Brand B Milk | Powder | 350 g | PE Bag | 04.05.2020 |
| Brand B Milk 2 (3.5% Fat) (spiking experiment) | Liquid | 500 mL | Carton Brick | 28.05.2020 |
| Brand C Milk (0.1% Fat) (spiking experiment) | Liquid | 1000 mL | Carton Brick | 08.09.2020 |

**Table S3. Concentrations of polymer standard solutions and related physical properties**

| **Polymer Type** | **Shape** | **Diameter (µm)** | **Spiked Mother Solutions**  **Concentration (MPs/µL)** |
| --- | --- | --- | --- |
| PMMA | Spherical | 8 | 1045 |
| PS | Spherical | 6 | 652 |
| PP | Fragment | 5-20 | 157 |
| PE | Fragment | 5-20 | 74 |
| PA | Fragment | 5-40 | 348 |


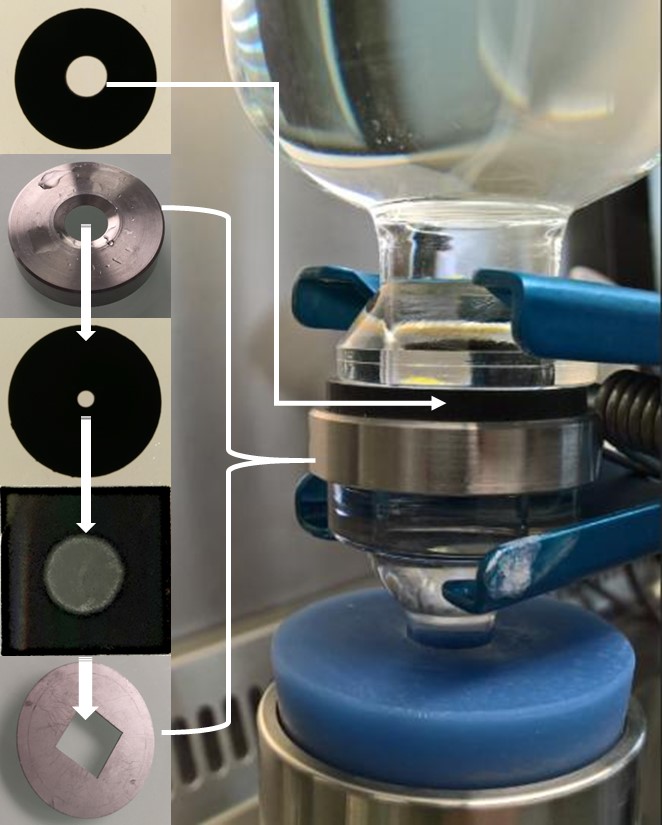


**Figure S1. Home-made filter mounting system for MPs isolation.**


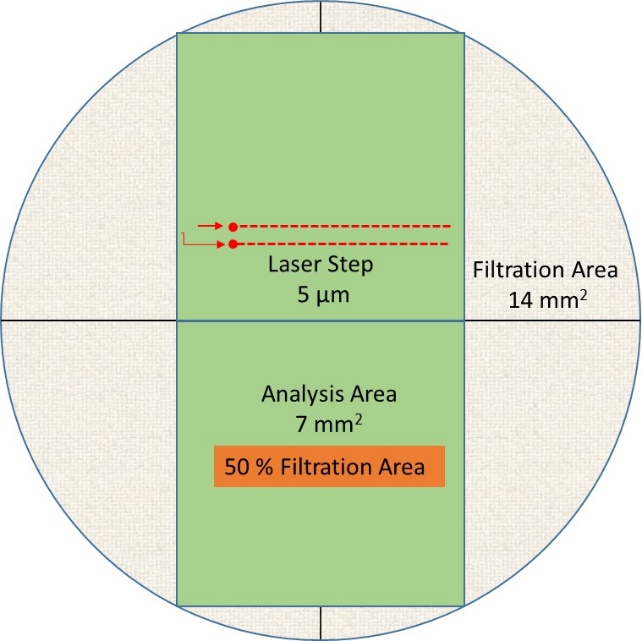


**Figure S2. Filtration area (14 mm2) used for µRaman point by point approach method with a step of 5 µm**

**References**

1. Miller, J. V. & Bartick, G. E., Forensic analysis of single fibers by Raman spectroscopy. Applied spectroscopy, 55, 12, 1729-1732 (2001).

2. Kida, T., Hiejima, Y. & Nitta, K-h., Raman spectroscopy study of high-density polyethylene during tensile deformation. International Journal of Experimental spectroscopy, 1-6, (2016).

3. Nielsen, A. S., Batchelder, D. N. & Pyrz, R., Estimation of crystallinity of isotactic polypropylene using Raman spectrsocopy. Polymer 43, 2671-2676, (2002).

4. Hu, C., Chen, X., Chen, J. Zhang, W. & Zhang, M. Q., Observation of mutual diffusion of macromolecules in PS/PMMA binary films by confocal Raman microscopy. Soft Matter, 8,17, 4780-4787 (2012).
